# Supplementary material
Source: publisher figshare collection journal article supplement (https://tandf.figshare.com/articles/dataset/_/6591665)
Supplement: Supplementary file 1 [file 3]

## Supplement: On Data Integration Problems with Manifolds

### A Proofs

#### Proof of Lemma 1

*Proof.* The  $\mathbf{y}_U$ -score of objective

$$\sum_{i \in L} \phi(y_i, f_i) + \|\mathbf{y}_U - \mathbf{f}_U\|_2^2 + \lambda \mathbf{f}^T \Delta \mathbf{f} + \gamma \|\mathbf{y}_U\|_2^2 \quad (1)$$

is  $\mathbf{y}_U - \mathbf{f}_U + \gamma \mathbf{y}_U = \vec{0}$  and verifies  $\mathbf{y}_U = (1 - p_\gamma) \mathbf{f}_U$  as optimal. Vector  $\mathbf{y}_U$  can then be profiled out of (1) because

$$\gamma \|\mathbf{y}_U\|_2^2 + \|\mathbf{f}_U - \mathbf{y}_U\|_2^2 = p_\gamma \|\mathbf{f}_U\|_2^2. \quad (2)$$

The  $\mathbf{f}_U$ -score is thus  $\lambda \Delta_{UL} \mathbf{f}_L + \lambda \Delta_{UU} \mathbf{f}_U + p_\gamma \mathbf{f}_U = \vec{0}$  and profiling out  $\mathbf{f}_U$  gives

$$\begin{aligned} \lambda \mathbf{f}_L^T \Delta_{LL}^* \mathbf{f}_L &= \lambda \mathbf{f}_L^T \Delta_{LL} \mathbf{f}_L + 2\lambda \mathbf{f}_L^T \Delta_{LU} + \mathbf{f}_U^T (\lambda \Delta_{UU} + p_\gamma \mathbf{I}) \mathbf{f}_U \\ &= \lambda \mathbf{f}^T \Delta \mathbf{f} + p_\gamma \mathbf{f}_U^T \mathbf{f}_U. \end{aligned} \quad (3)$$

□

#### Proof of Proposition 1

*Proof.* This proof is based on the observation that the sum of the 4 penalty terms

$$\|\mathbf{y}_U - \boldsymbol{\eta}_U^*\|_2^2 + \lambda_0 \|\boldsymbol{\beta}\|_2^2 + \sum_{\ell=1}^q \lambda_\ell \mathbf{f}^{(\ell)T} \Delta^{(\ell)} \mathbf{f}^{(\ell)} + \gamma \|\mathbf{y}_U\|_2^2$$

is a quadratic form with the vector of  $n - m + p + nq$  unknown variables and a known, symmetric, positive semi-definite matrix. When this observation is combined with the use of labeled loss, optimal  $\mathbf{y}_U$  and the  $\mathbf{f}_U^{(\ell)}$  must be linear in  $\boldsymbol{\beta}$ , and the  $\mathbf{f}_L^{(\ell)}$ , so the existence of matrix  $\mathbf{P}$  follows.

To see this, proceed as in the proof of Lemma 1 to get  $\mathbf{y}_U = (1 - p_\gamma) \boldsymbol{\eta}_U$  analogous to (2) and profile out  $\mathbf{y}_U$ . The score for any  $\mathbf{f}_U^{(\ell)}$  reduces to  $\lambda_\ell \Delta_{UL}^{(\ell)} \mathbf{f}_L^{(\ell)} + \lambda_\ell \Delta_{UU}^{(\ell)} \mathbf{f}_U^{(\ell)} + p_\gamma \boldsymbol{\eta}_U^* = \vec{0}$ , verifies

$$\left( \text{diag} \left( \lambda_\ell \Delta_{UU}^{(\ell)} \right) + p_\gamma \mathbf{J} \otimes \mathbf{I} \right) \text{vec} \left( \widehat{\mathbf{f}}_U^{(\ell)} \right) = -\text{vec} \left( \lambda_\ell \Delta_{UL}^{(\ell)} \widehat{\mathbf{f}}_L^{(\ell)} + \mathbf{X}_U \boldsymbol{\eta}_U^* \right),$$

and shows that each  $\mathbf{f}_U^{(\ell)}$  is linear in  $\beta$  and  $\left\{ \mathbf{f}_L^{(\ell)} \right\}_{\ell=1}^q$ . For any  $\ell \in \{1, \dots, q\}$ ,

$$\begin{aligned} \lambda_\ell \mathbf{f}_U^{(\ell)} \Delta^{(\ell)} \mathbf{f}_U^{(\ell)} + p_\gamma \boldsymbol{\eta}_U^{*T} \boldsymbol{\eta}_U^* &= \lambda_\ell \mathbf{f}_L^{(\ell)T} \Delta_{LL}^{(\ell)} \mathbf{f}_L^{(\ell)} - 2\lambda_\ell \mathbf{f}_U^{(\ell)T} \Delta_{UL}^{(\ell)} \mathbf{f}_L^{(\ell)} \\ &\quad + \lambda_\ell \mathbf{f}_U^{(\ell)T} \Delta_{UU}^{(\ell)} \mathbf{f}_U^{(\ell)} + p_\gamma \sum_{r=0}^q \mathbf{f}_U^{(r)T} \mathbf{f}_U^{(\ell)} \end{aligned}$$

with  $\mathbf{f}_U^{(0)} = \mathbf{X}_U \beta$ . From this, reduction (3) generalizes to

$$\left\| \left( \text{diag} \left( \lambda_\ell \Delta_{LL}^{(\ell)} \right) \right)^{\frac{1}{2}} \text{vec} \left( \mathbf{f}_L^{(\ell)} \right) \right\|_2^2 - \left\| \left( \text{diag} \left( \lambda_\ell \Delta_{UU}^{(\ell)} \right) + p_\gamma \mathbf{J} \otimes \mathbf{I} \right)^{-\frac{1}{2}} \text{vec} \left( \lambda_\ell \Delta_{UL}^{(\ell)} \mathbf{f}_L^{(\ell)} \right) \right\|_2^2,$$

which equals the penalty due to the lower-right  $qm \times qm$  block of  $\mathbf{P}$ . The lower-left  $qm \times p$  block of  $\mathbf{P}$  is  $p_\gamma \mathbf{X}_U$  stacked  $q$  times, while the upper-right  $p \times qm$  block is its transpose. The upper-left  $p \times p$  block of  $\mathbf{P}$  will be  $p_\gamma \mathbf{X}_U^T \mathbf{X}_U + \lambda_0 \mathbf{I}$ .  $\square$

## Proof of Proposition 2

*Proof.* The  $\mathbf{y}_U$  terms in objective

$$\sum_{i \in L} \phi(y_i, \mathbf{T}_i \boldsymbol{\psi}) + \|\mathbf{y}_U - \mathbf{T}_U \boldsymbol{\psi}\|_2^2 + \boldsymbol{\psi}^T \mathbf{Q} \boldsymbol{\psi} + \gamma \|\mathbf{y}_U\|_2^2$$

have score  $\mathbf{y}_U - \mathbf{T}_U \boldsymbol{\psi} + \gamma \mathbf{y}_U = \vec{0}$  which verifies  $\mathbf{y}_U = (1 - p_\gamma) \mathbf{T}_U \boldsymbol{\psi}$ . Vector  $\mathbf{y}_U$  is then profiled out through the identity  $\gamma \|\mathbf{y}_U\|_2^2 + \|\mathbf{T}_U \boldsymbol{\psi} - \mathbf{y}_U\|_2^2 = p_\gamma \|\mathbf{T}_U \boldsymbol{\psi}\|_2^2$ .  $\square$

## Proof of Theorem 1

*Proof.* Let  $\tilde{\mathbf{f}}_U = -(\Delta_{UU} + \frac{p_\gamma}{\lambda} \mathbf{I})^{-1} \Delta_{UL} \hat{\mathbf{f}}_{0L} = \sum_{i=1}^{n-m} \frac{\hat{a}_{0i} \mathbf{o}_i}{d_i + p_\gamma}$ . Consider error simplification

$$\begin{aligned} Q_1(\gamma) &= \mathbb{E} \left[ \left\| \hat{\mathbf{f}}_U - \mathbf{g}_U \right\|_2^2 \right] \\ &= \mathbb{E} \left[ \left\| \tilde{\mathbf{f}}_U - \mathbf{g}_U \right\|_2^2 \right] + 2\mathbb{E} \left[ \left( \tilde{\mathbf{f}}_U - \mathbf{g}_U \right)^T \left( \hat{\mathbf{f}}_U - \tilde{\mathbf{f}}_U \right) \right] + \mathbb{E} \left[ \left\| \tilde{\mathbf{f}}_U - \hat{\mathbf{f}}_U \right\|_2^2 \right] \\ &= \mathbb{E} \left[ \left\| \tilde{\mathbf{f}}_U - \mathbf{g}_U \right\|_2^2 \right] + \sum_{i=1}^{n-m} \frac{\mathbb{E}[(\hat{a}_{0i} - \hat{a}_{\gamma i})^2]}{(d_i + p_\gamma)^2} + 2 \sum_{i=1}^{n-m} \mathbb{E} \left[ \left( \frac{\hat{a}_{0i}}{d_i + p_\gamma} - b_i \right) \frac{(\hat{a}_{0i} - \hat{a}_{\gamma i})}{d_i + p_\gamma} \right] \\ &\leq \mathbb{E} \left[ \left\| \tilde{\mathbf{f}}_U - \mathbf{g}_U \right\|_2^2 \right] + \epsilon^2 + \frac{2\epsilon}{\sqrt{n-m}} \sum_{i=1}^{n-m} \mathbb{E} \left[ \left| \frac{\hat{a}_{0i}}{d_i + p_\gamma} - b_i \right| \right] \\ &\leq \mathbb{E} \left[ \left\| \tilde{\mathbf{f}}_U - \mathbf{g}_U \right\|_2^2 \right] + \frac{2M}{\sqrt{n-m}} \epsilon + \epsilon^2. \end{aligned}$$

From Assumption 2 of the main paper, let  $r_i = \mathbf{o}_i^T \Sigma \mathbf{o}_i$ , so

$$Q_2(p_\gamma) = \mathbb{E} \left[ \left\| \tilde{\mathbf{f}}_U - \mathbf{g}_U \right\|_2^2 \right] = \sum_{i=1}^{n-m} \mathbb{E} \left[ \left( \frac{\hat{a}_{0i}}{d_i + p_\gamma} - b_i \right)^2 \right] = \sum_{i=1}^{n-m} \frac{r_i \sigma^2 + (a_i - b_i(d_i + p_\gamma))^2}{(d_i + p_\gamma)^2}. \quad (4)$$

The derivative of (4) with respect to  $p_\gamma$  evaluated at  $p_\gamma = 0$  is

$$\begin{aligned} \left. \frac{\partial Q_2(p_\gamma)}{\partial p_\gamma} \right|_{p_\gamma=0} &= -2 \sum_{i=1}^{n-m} \left( \frac{r_i \sigma^2 + (a_i - b_i(d_i + p_\gamma))^2}{(d_i + p_\gamma)^3} + \frac{(b_i(a_i - b_i(d_i + p_\gamma)))}{(d_i + p_\gamma)^2} \right) \Big|_{p_\gamma=0} \\ &= -2 \sum_{i=1}^{n-m} \frac{r_i \sigma^2 + a_i^2 - a_i b_i d_i}{d_i^3} \end{aligned}$$

and is negative if

$$\sigma^2 > \left( \frac{\sum_{i=1}^{n-m} (a_i b_i d_i - a_i^2) / d_i^3}{\sum_{i=1}^n \|\Sigma^{1/2} \mathbf{o}_i\|_2^2 / d_i^3} \right)_+.$$

□

## Proof of Theorem 2

*Proof.* If  $\tilde{\mathbf{w}}_j = \mathbf{R}^{1/2} \mathbf{w}_j$ , then  $\{\tau_j, \tilde{\mathbf{w}}_j\}$  is an eigen-decomposition of  $\mathbf{R}^{-1/2 T} \mathbf{T}_U^T \mathbf{T}_U \mathbf{R}^{-1/2} \succeq 0$  such that

$$\mathbf{w}_{j'}^T \mathbf{T}_U^T \mathbf{T}_U \mathbf{w}_j = \tilde{\mathbf{w}}_{j'}^T \mathbf{R}^{-1/2 T} \mathbf{T}_U^T \mathbf{T}_U \mathbf{R}^{-1/2} \tilde{\mathbf{w}}_j = \tau_j \tilde{\mathbf{w}}_{j'}^T \tilde{\mathbf{w}}_j = \tau_j \mathcal{I}_{\{j'=j\}}.$$

Let  $\tilde{\mathbf{c}} = \mathbf{R}^{1/2} \hat{\mathbf{c}}$ . Project  $\tilde{\mathbf{c}} = \sum_{j=1}^{\tilde{p}} \hat{a}_j \tilde{\mathbf{w}}_j$ , so  $\hat{\mathbf{c}} = \sum_{j=1}^{\tilde{p}} \hat{a}_j \mathbf{w}_j$  and  $\hat{\boldsymbol{\psi}} = \sum_{j=1}^{\tilde{p}} \frac{\hat{a}_j}{1 + p_\gamma \tau_j} \mathbf{w}_j$ . Let  $r_j = \mathbf{w}_j^T \tilde{\Sigma} \mathbf{w}_j$ . Thus,

$$\begin{aligned} Q_3(p_\gamma) &= \mathbb{E} \left[ \left\| \mathbf{T}_U (\hat{\boldsymbol{\psi}}_\gamma - \boldsymbol{\theta}) \right\|_2^2 \right] \\ &= \sum_{j=1}^{\tilde{p}} \tau_j \mathbb{E} \left[ \left( \frac{\hat{a}_j}{1 + p_\gamma \tau_j} - q_j \right)^2 \right] \\ &= \sum_{j=1}^{\tilde{p}} \frac{\tau_j}{(1 + p_\gamma \tau_j)^2} (r_j \sigma^2 + h_j(p_\gamma)), \end{aligned} \quad (5)$$

where  $h_j(p_\gamma) = (\mu_j - q_j(1 + p_\gamma \tau_j))^2$ . The derivative of (5) with respect to  $p_\gamma$  is

$$\left( \frac{\partial Q_3(p_\gamma)}{\partial p_\gamma} \right) \Big|_{p_\gamma=0} = \sum_{j=1}^{\tilde{p}} -2\tau_j^2 (r_j \sigma^2 + \mu_j^2 - \mu_j q_j) < 0$$

whenever  $\sigma^2$  satisfies the given bound. □
